# Supplementary material for: BioTriangle: a web-accessible platform for generating various molecular representations for chemicals, proteins, DNAs/RNAs and their interactions
Source: PubMed Central journal article supplement (PMC4915156; doi:10.1186/s13321-016-0146-2), 2016-06-21
Supplement: 13321_2016_146_MOESM5_ESM.pdf [file 13321_2016_146_MOESM5_ESM.pdf]

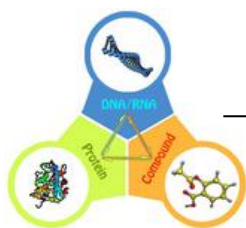

# BioTriangle

---

--BioCPI, BioDPI, BioCDI

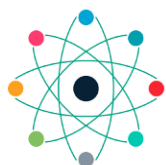

COMPUTATIONAL BIOLOGY &  
DRUG DESIGN GROUP  
CENTRAL SOUTH UNIV., CHINA

The descriptor calculation of chemical-protein interaction, protein-DNA/RNA interaction, and chemical-DNA/RNA interaction is similar to each other in BioCPI, BioDPI and BioCDI. Next, we will show how to construct an interaction feature by the chemical-protein interaction example.

### **Chemical-protein interaction descriptors**

There are two methods for construction of descriptor vector  $\mathbf{F}$  for chemical-protein interaction from the protein descriptor vector  $\mathbf{F}_t(\mathbf{F}_t(i), i = 1, 2, \dots, p_t)$  and chemical descriptor vector  $\mathbf{F}_d(\mathbf{F}_d(i), i = 1, 2, \dots, p_d)$ :

(1) One vector  $\mathbf{V}$  with dimension of  $p_t + p_d$  are constructed:  $\mathbf{F} = (\mathbf{F}_t, \mathbf{F}_d)$  for interaction between protein T and ligand D.

(2) One vector  $\mathbf{V}$  with dimension of  $p_t \times p_d$  is constructed by the tensor product:  $\mathbf{F} = \{\mathbf{F}(k) = \mathbf{F}_t(i) \times \mathbf{F}_d(j), i = 1, 2, \dots, p_t, j = 1, 2, \dots, p_d, k = (i-1) \times p_t + j\}$ .

©2015 Computational Biology & Drug Design Group, CSTC, China
